# Supplementary material for: Trends and Perceptions of Electronic Health Record Usage among Plastic Surgeons
Source: PubMed Central journal article supplement — Plast Reconstr Surg Glob Open. 2020 Apr 24;8(4):e2709. doi: 10.1097/GOX.0000000000002709 (PMC7209869; doi:10.1097/gox.0000000000002709), 2020-04-24
Supplement: gox-8-e2709-s001.pdf [file gox-8-e2709-s001.pdf]

INTRODUCTION

**We are conducting a survey to assess perceptions and trends in electronic health record (EHR) usage among American plastic surgeons.**

**At your earliest convenience, please take a few minutes to complete our survey. Your responses to this survey could help us better understand the opinions, practices, and sense of agency plastic surgeons have on this increasingly important healthcare issue.**

PRACTICE DEMOGRAPHICS (1 of 4)

**Please select the item that best describes your practice setting. For the purpose of this survey, your practice includes those providers with whom you share a common medical record system.**

1. Does your practice currently use EHR?

Yes

No

2. What is your primary practice setting?

University/academic

Hospital-based employment (e.g. Kaiser, Mercy, etc.)

Private Practice - solo

Private Practice - group

3. How many plastic surgeons are in your practice? (Please enter a number in the field below)

PHYSICIAN CHARACTERISTICS (2 of 4)

**The following questions apply to you as the physician responding to the survey and not to your practice as a whole.**

4. How old are you? (Enter numbers only)

Age in years:

5. How many years have you practiced plastic surgery? (Enter numbers only)

Years of practice:

6. What types of plastic surgery procedures do you specialize in (check all the apply)?

- Aesthetic
- Burn
- Craniofacial
- General
- Hand
- Microsurgery
- Pediatric

7. Have you ever used paper medical records, either during training or in practice?

- Yes
- No

8. If you use or plan on using EHR, what convinced you to do so? Select all that apply.

- Requirement
- Ease/ efficiency of use
- Financial incentives
- Security
- Colleague recommendation
- I don't use/don't plan on using EHR

9. How many years have you spent using EHR? (Enter **number** in box below)

Number of years:

10. Which EHR vendor do you currently use?

- Allscripts
- AmazingCharts.com
- athenahealth
- Care 360
- CERNER/ powerchart
- CPRS
- eClinicalWorks
- EPIC
- GE Healthcare
- McKesson
- Meditech
- Nextech
- NextGen Healthcare
- OPTUMInsight
- Practice Fusion
- Sunrise/ POE
- I don't use EHR
- Other (please specify)

11. Who physically enters data into your EHRor paper-based system? Select all that apply.

- Physicians
- Scribes
- Nurses
- Medical Assistants
- Technicians
- Secretaries

12. Who *primarily* enters data in your EHR or paper-based system?

- Physician
- Support Staff
- Shared Evenly Between Physician and Support Staff
- I do not use EHR

PERCEPTIONS OF EHR USAGE IN YOUR OWN PRACTICE (3 of 4)

The following questions will ask you to describe the impact of EHR on specific aspects of your own practice.

13. If you currently use EHR, rate the effect of your EHR on the aspects of your practice listed below:

|                                   | Negative Impact       | No Impact             | Positive Impact       | Not sure              |
|-----------------------------------|-----------------------|-----------------------|-----------------------|-----------------------|
| Chart review                      | <input type="radio"/> | <input type="radio"/> | <input type="radio"/> | <input type="radio"/> |
| Documenting                       | <input type="radio"/> | <input type="radio"/> | <input type="radio"/> | <input type="radio"/> |
| Prescribing medications           | <input type="radio"/> | <input type="radio"/> | <input type="radio"/> | <input type="radio"/> |
| Clinical decision-making          | <input type="radio"/> | <input type="radio"/> | <input type="radio"/> | <input type="radio"/> |
| Physician referrals/communication | <input type="radio"/> | <input type="radio"/> | <input type="radio"/> | <input type="radio"/> |
| Patient communication             | <input type="radio"/> | <input type="radio"/> | <input type="radio"/> | <input type="radio"/> |
| Mitigating medication errors      | <input type="radio"/> | <input type="radio"/> | <input type="radio"/> | <input type="radio"/> |
| Operating costs                   | <input type="radio"/> | <input type="radio"/> | <input type="radio"/> | <input type="radio"/> |
| Work flow                         | <input type="radio"/> | <input type="radio"/> | <input type="radio"/> | <input type="radio"/> |
| Net revenue                       | <input type="radio"/> | <input type="radio"/> | <input type="radio"/> | <input type="radio"/> |

14. What is your overall attitude towards your current EHR vendor?

- Positive
- Negative
- I do not use EHR

15. Have you changed from one EHR vendor to another within the last 6 months?

- Yes
- No

16. Which of the following best describes your opinion regarding the **quality of care** you deliver with electronic records compared to paper records?

- Worse** with EHR than it is with paper records
- Same** with EHR than it is with paper records
- Better** with EHR than it is with paper records
- Cannot compare - I have never used paper records
- Cannot compare - I do not use EHR

Comments and Concerns

17. Please provide any comments or concerns here:
